1 **APPLICATION**

2 **Batch-Mask: An automated Mask R-CNN workflow to isolate**  
3 **non-standard biological specimens for color pattern analysis**

4 John David Curlis<sup>1,2</sup> | Timothy Renney<sup>1</sup> | Alison R. Davis Rabosky<sup>2</sup> | Talia Y. Moore<sup>\*2,4</sup>

<sup>1</sup> Authors contributed equally.

<sup>2</sup> Ecology and Evolutionary Biology and  
Museum of Zoology, University of  
Michigan, Michigan, USA

<sup>3</sup> Computer Science, University of Michigan,  
Michigan, USA

<sup>4</sup> Mechanical Engineering and Robotics  
Institute, University of Michigan,  
Michigan, USA

**Correspondence**

\*Talia Y. Moore Email: [taliaym@umich.edu](mailto:taliaym@umich.edu)

**Abstract**

1: Efficient comparisons of biological color patterns are critical for understanding the mechanisms by which organisms evolve in ecosystems, including sexual selection, predator-prey interactions, and thermoregulation. However, elongate or spiral-shaped organisms do not conform to the standard orientation and photographic techniques required for automated analysis. Currently, large-scale color analysis of elongate animals requires time-consuming manual landmarking, which reduces their representation in coloration research despite their ecological importance.

2: We present Batch-Mask: an automated and customizable workflow to facilitate the analysis of large photographic data sets of non-standard biological subjects. First, we present a user guide to run an open-source region-based convolutional neural network with fine-tuned weights for identifying and isolating a biological subject from a background (masking). Then, we demonstrate how to combine masking with existing manual visual analysis tools into a single streamlined, automated workflow for comparing color patterns across images.

3: Batch-Mask was 60x faster than manual landmarking, produced masks that correctly identified 96% of all snake pixels, and produced pattern energy results that were not significantly different from the manually landmarked data set.

4: The fine-tuned weights for the masking neural network, user guide, and automated workflow substantially decrease the amount of time and attention required to quantitatively analyze non-standard biological subjects. By using these tools, biologists will be able to compare color, pattern, and shape differences in large data sets that include significant morphological variation in elongate body forms. This advance will be especially valuable for comparative analyses of natural history collections, and through automation can greatly expand the scale of space, time, or taxonomic breadth across which color variation can be quantitatively examined.

**KEYWORDS:**

convolutional neural network; photography; sensory ecology; color evolution; vision; image segmentation

5

## 1 | INTRODUCTION

7 The increasing digitization of museum specimens and the convenience of digital photography provide unparalleled opportunity  
8 to quantify how color varies across the entire tree of life. However, high morphological shape variation across taxa poses a  
9 challenge for automated image analysis tools, requiring prohibitively labor-intensive analysis with manual approaches. Snakes  
10 in particular demonstrate impressive variation in coloration and patterning (Allen et al., 2013) that serve critical functions, such  
11 as anti-predator signaling (Brodie III, 1993). Despite the iconic role of snake coloration in ecology and evolution, analysis of  
12 snakes and other elongate organisms lags behind taxa like insects and birds, specifically due to challenges in automating color  
13 quantification.

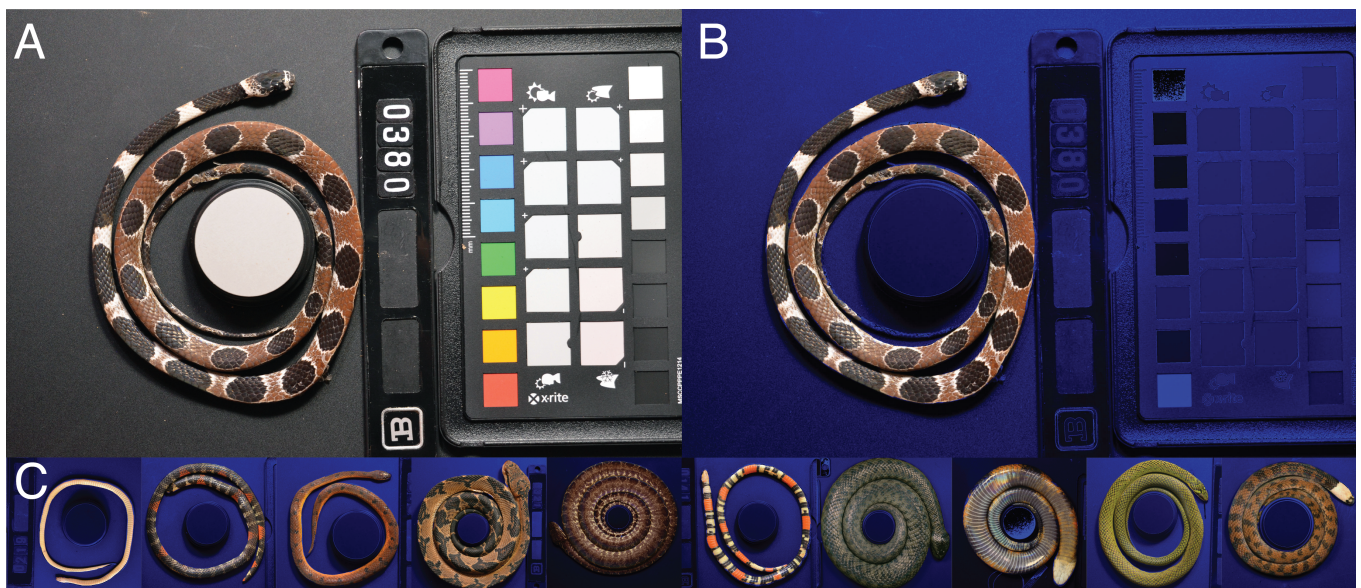

**FIGURE 1** Batch-Mask fine-tuned weights use a neural network to take A) unlabeled photographs of circular or coiled biological specimens to generate B) a background-masked image. C) Batch-Mask is 60x faster than manual landmarking for specimens that vary in color, color pattern, thickness, coiling, and lighting conditions.

14 When using photography to collect color data, it is essential to identify which portions of a photograph are associated with the  
15 biological subject and which are calibration tools or part of the background (i.e., masking). Generally, standardizing preparation  
16 and photographing protocols reduces postural variation and enables comparison among specimens by facilitating the isolation of  
17 a biological subject. Morphological features, such as limbs, are often used as landmarks to identify color variation in homologous  
18 regions (Van Belleghem et al., 2018). Because snakes and many other animals lack limbs, their elongated body forms cannot be  
19 consistently positioned for photographic data collection. Snakes are usually coiled into circles or spirals for practicality, but the  
20 number, the diameter, and direction of the coils (clockwise or counterclockwise) vary greatly because snake length spans six

orders of magnitude (Feldman et al., 2015). Such high disparity in morphology and posture hinders the application of traditional image processing techniques.

Recently, machine learning has facilitated the automated detection and visual categorization of biological information in large and complex datasets (Li et al., 2018). Machine learning can be performed by neural networks, which consist of processing nodes that distribute information to neighboring nodes, much like a human brain (Suk, 2017). These networks can be trained to perform specific tasks by providing a dataset in which the task has already been performed (i.e., a training set; see Section 6 for glossary). Then, the trained neural network can be applied to an unlabeled dataset to perform the same task (i.e., inference). By including sufficient variability in the training set, the trained neural network can robustly perform the task on diverse real-world biological data that vary in color, position, size, orientation, and resolution (Davis et al., 2020; Diritia et al., 2020; Kumar and Das, 2019).

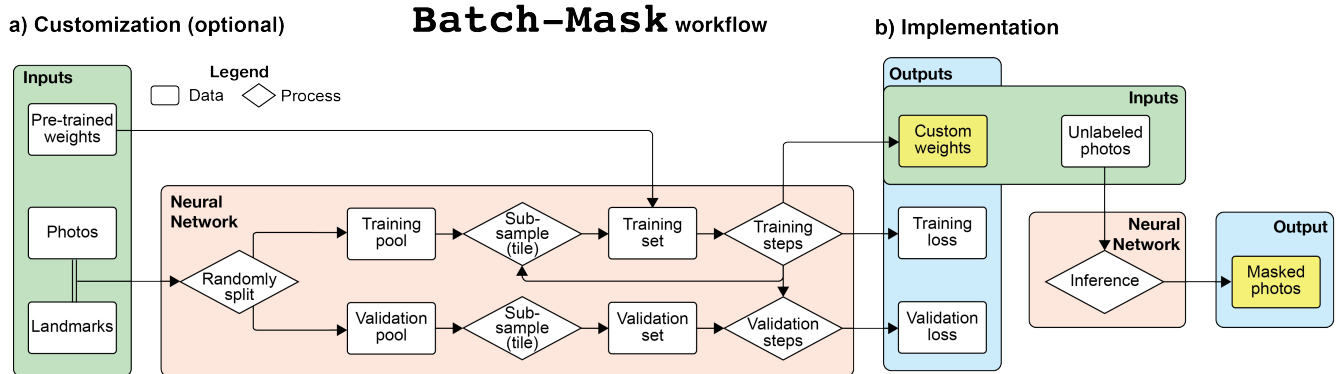

**FIGURE 2** Summary diagram of the Batch-Mask work flow. A) Landmarked data from a few photographs are used to train a neural network and generate fine-tuned weights. This is unnecessary if the data set is visually similar to coiled snakes. B) Biological subjects are automatically isolated from an unlimited number of photographs without landmarks. Yellow boxes indicate outputs used for downstream processes

Here, we present an automated and customizable workflow (Batch-Mask) using a region-based convolutional neural network (R-CNN) to identify and isolate pixels associated with biological specimens from photographs (Figure 1). First, we describe how we used labeled photographs to train the neural network for these diverse biological specimens (Section 3.2, Figure 2 A). Then, we use the inferred weights to automate masking of unlabeled photographs (Section 3.4, Figure 2 B). Finally, we demonstrate how Batch-Mask combines with other tools to automate biological image processing (Section 5, Figure 2 C). Due to their challenging variability, we use a diverse benchmark photographic dataset of 33 species of neotropical snake to assess automated masking and color pattern analysis (University of Michigan Museum of Zoology, Division of Herpetology et al., 2021). Because the weights are fine-tuned for a diverse dataset of coiled snakes, Batch-Mask is readily applied or trained to analyze other coiled forms, including whole organisms, organs, or tissues. By using a neural network to accommodate large amounts

of variation in morphology and posture, this approach facilitates the automated analysis of highly diverse datasets for use in ecological and evolutionary analysis of color patterns.

## 2 | REQUIREMENTS AND INPUTS

### 2.1 | Software

The Batch-Mask source code can be run through online cloud-based tools (such as Google Colab) to minimize hardware-induced performance constraints. Programs such as ImageJ ([Schindelin et al., 2012](#)) or TPSDIG ([Rohlf](#)) can be used to landmark the borders of a snake in training set photographs. Alternatively, the source code can be modified or run on a local machine, though we recommend access to a GPU. A list of required Python libraries is included in the source code). Any color calibration or color pattern analysis software can be used for downstream processing; here, we incorporated the `micaToolbox` ([Troscianko and Stevens, 2015](#)) plugin for ImageJ into a fully automated Python workflow.

### 2.2 | Obtaining images

We trained and tested the neural network of Batch-Mask on an open-source dataset of Neotropical snakes ([University of Michigan Museum of Zoology, Division of Herpetology et al., 2021](#)). All specimens were photographed before preservation using a Nikon D7000 digital SLR camera (Nikon Inc., Melville, NY, USA) with a Coastal Optics UV-VIS-IR 60 mm F/4 macro lens (Jenoptik Optical Systems, Jupiter, FL, USA) using variable shutter speeds, F-stops, and ISO. Each specimen was illuminated from multiple angles using fluorescent and UV light bulbs. Each photograph contained one specimen, a set of color standards (X-rite Colorchecker Passport Pro), and a circular gray standard (40% Spectralon Diffuse Reflectance Standard) that also functioned as an object of known diameter for size calibration. Photographs were saved as JPG files, but Batch-Mask is compatible with any image file type.

To facilitate accurate downstream color comparisons, we wrote a custom macro in Photoshop (Adobe Inc., San Jose, USA) that uses the AutoColor tool to calibrate the color in each photograph. We also used the OpenCV ([Bradski, 2000](#)) `GaussianBlur` function with a 5x5 pixel kernel size to pre-process the photographs for the neural network.

### 2.3 | Creating labeled data

To train and implement our model, we labeled a set of 151 photographs (Set 1 in the dataset) that included species with diverse colors and patterns and both dorsal and ventral views of each snake. We recommend that the dataset include a wide range of color, size, shape, and pattern variation to maximize generalizability and minimize overfitting (see Section 3.3).

We used the `tpsDig` program ([Rohlf](#)) to manually place landmarks along each side of the snake's body to indicate the pixels associated with the snake. We then used a custom script to convert the tps outline into a JSON file.



68 Note that the output masks are highly dependent on the labeled data. In our dataset, lateral scales visible from the ventral view  
69 of the snake were excluded from the ventral landmarking due to substantially different color patterning (Figure S1), resulting  
70 in output masks of ventral photographs that identify regions most relevant to biological analyses, rather than the edge of the  
71 snake's body.

## 72 **3 | TRAINING AND IMPLEMENTATION**

73 To facilitate customization for biological subjects that differ greatly from the visual appearance of snake, we describe how to  
74 train the neural network to a customized ground truth dataset. However, if coiled or circular subjects are being analyzed, refer  
75 to Section 3.4 to begin implementation.

### 76 **3.1 | Creating training and validation sets**

77 We randomly divided the 151 landmarked JSON files into a training pool of 135 labeled photographs and a validation pool of 16  
78 labeled photographs, a ratio of 9:1 (see (Guyon, 1997) to determine optimal ratio). In every training step, we randomly selected  
79 a photograph from the training pool, then randomly sampled one 512 x 512 pixel square image (tile) from the photograph for  
80 the training set. We created one fixed validation set by randomly choosing 32 x,y coordinates and sampling a 512 x 512 pixel  
81 tile at each location from each photograph in the validation pool. Note that no validation tiles overlap with training tiles because  
82 they are sampled from different pools of photographs. However, validation tiles may stochastically overlap with each other .

### 83 **3.2 | Training the neural network**

84 Batch-Mask utilizes a customized region-based convolutional neural network (R-CNN) model (He et al., 2017) to generate  
85 masks of snakes in photographs. This neural network uses the training process to fine-tune mask weights ( $W_{FT}$ ) from pre-trained  
86 weights ( $W_{PT}$ ) provided with Mask R-CNN (obtained from training on the COCO dataset (Abdulla, 2017)). On Google Colab  
87 (Abadi et al., 2015), we set the GPU count to 1 and the number of images per GPU to 1. Our learning rate was 0.0001 (see  
88 Section 4.1). All other parameters in the configuration file were left to their default values.

89 The number of validation steps must be equal to the number of tiles in the validation set so that loss is calculated on the full  
90 validation set for every epoch. Mask-RCNN suggests using twice as many training steps as validation steps (Abdulla, 2017).  
91 The number of training and validation steps in an epoch does not affect model accuracy, but if training and validation loss values  
92 converge after a single epoch, decreasing the number of training steps will reveal the progression of loss values. Decreasing  
93 training steps should be accompanied by decreasing validation steps, such that a roughly 2:1 ratio is maintained. If the loss  
94 values take more than 12 hours to converge, the number of training steps can be increased. If both the training and validation  
95 loss plateau at non-zero values, Section 4.1 discusses how model settings can be adjusted to increase accuracy.

96 The training that resulted in the best masks used 450 training steps and 50 validation steps for each epoch. We trained for  
97 20 epochs, each lasting 1.21 hours. The training and validation losses plateaued at 16 epochs, after which the validation losses  
98 began increasing (likely due to overfitting). The weight values at 16 epochs were used for inference. Our training process duration  
99 was 24.2 hours.

### 100 3.3 | Loss and model accuracy

101 We calculated training and validation losses using the ratio of correctly labeled pixels divided by all labeled pixels  
102 (Table S1). This loss equation does not penalize pixels incorrectly identified. The training loss values inform the training process,  
103 but the validation loss does not. We assessed model accuracy by comparing loss values after each epoch to assess asymptotic  
104 curves (Figure 3), indicating diminishing increases in accuracy with additional training.

105 Based on the validation loss, Batch-Mask was successful in rapidly isolating pixels associated with a biological subject from  
106 the background. To maximize the size of our training and validation sets, we used the validation loss at the epoch used for  
107 inference to represent the accuracy of the trained neural network, instead of inferring masks for a labeled test set. We qualitatively  
108 examined the output masks for an unlabeled test set (Section 3.4), which we found to be usable.

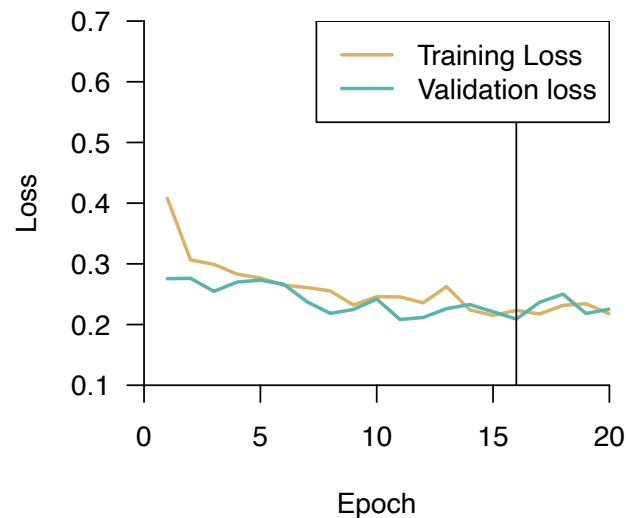

**FIGURE 3** The loss calculations from a successful training process. The training loss is plotted in orange, the validation loss is plotted in teal. Epoch is indicated on the x-axis. Note that the training loss values decrease exponentially in the first epoch. The model weights corresponding to epoch 16, indicated by the black vertical line, were used for inference because this is the onset of the validation loss plateau.

### 109 **3.4 | Implementation on Unlabeled Data (Inference)**

110 To demonstrate the utility of our automated workflow to accurately process images outside of our training and validation sets,  
111 we implemented Batch-Mask on a test set of 50 unlabeled photographs (Set 2) ([University of Michigan Museum of Zoology,  
112 Division of Herpetology et al., 2021](#)), each subdivided into 212 tiles of 512 x 512 pixel resolution with 100 pixels of overlap  
113 with neighboring tiles in each direction. The implementation of the trained model required approximately 25 minutes to mask 50  
114 unlabeled images. By comparison, generating a JSON file of ROIs for an equal number of images would require approximately  
115 25 hours for a trained human to do by hand (based on landmarking rates in the training set).

116 Because there are no landmarks associated with these photographs, we created a Python workflow that displays a random  
117 subset of masks overlaid on original photos to qualitatively assess mask accuracy.

## 118 **4 | PARAMETER OPTIMIZATION**

119 To assist with troubleshooting and customization of the workflow, we discuss settings as they relate to loss, mask outputs, and  
120 computation time. However, we note that this is not an exhaustive guide and other settings could also be modified (such as  
121 learning momentum, relative loss values, and mask shape).

### 122 **4.1 | Troubleshooting and modifying settings**

123 The three parameters that have the most effect on output are learning rate, tile size (resolution), and tile overlap. Learning rate  
124 controls the magnitude of the correction to the weights in response to a mismatch between training output and the labeled data.  
125 High learning rate values cause the training and validation loss values to diverge or wildly oscillate, while small values result in  
126 slower convergence but less oscillation. We recommend starting with smaller learning rate values and slowly increasing between  
127 training sessions to improve performance. Note, the Mask R-CNN code includes by default a learning rate decay throughout a  
128 training session, which was not modified for this method.

129 The resolution of each tile, the number of subdivisions, and the overlap between neighboring tiles sampled from each pho-  
130 tograph are all interdependent. If the entire ROI is not identified (Figure 4 A, top) or if undesired regions are included, we  
131 recommend decreasing tile size (increasing the number of subdivisions for the same amount of overlap) to increase mask res-  
132 olution. A higher resolution typically produces a more accurate model but requires exponentially more memory (Figure 4 A,  
133 bottom).

134 If mask inaccuracies correspond to the edges of subdivided image tiles, we recommend increasing overlap (the number  
135 of pixels shared between neighboring tiles). With higher overlap, features are viewed in multiple contexts, providing more  
136 opportunities for proper identification. Alternatively, decreasing overlap reduces computation time for acceptable output masks.

## 137 4.2 | Overfitting

138 Accuracy is highest when the distribution of variation in the training and validation sets match. Overfitting occurs when the  
139 model is complex enough to memorize the entire training dataset, resulting in poor generalization (training loss decreases, but  
140 validation loss plateaus or increases after a plateau). To avoid overfitting, expand the size and variation within the training set  
141 (specimen size, shape, pattern diversity, color) to more accurately reflect the variation in the validation set. If diversity cannot  
142 be expanded with additional images, randomly changing the brightness and the hue of each image enhances useful variation in  
143 the training set.

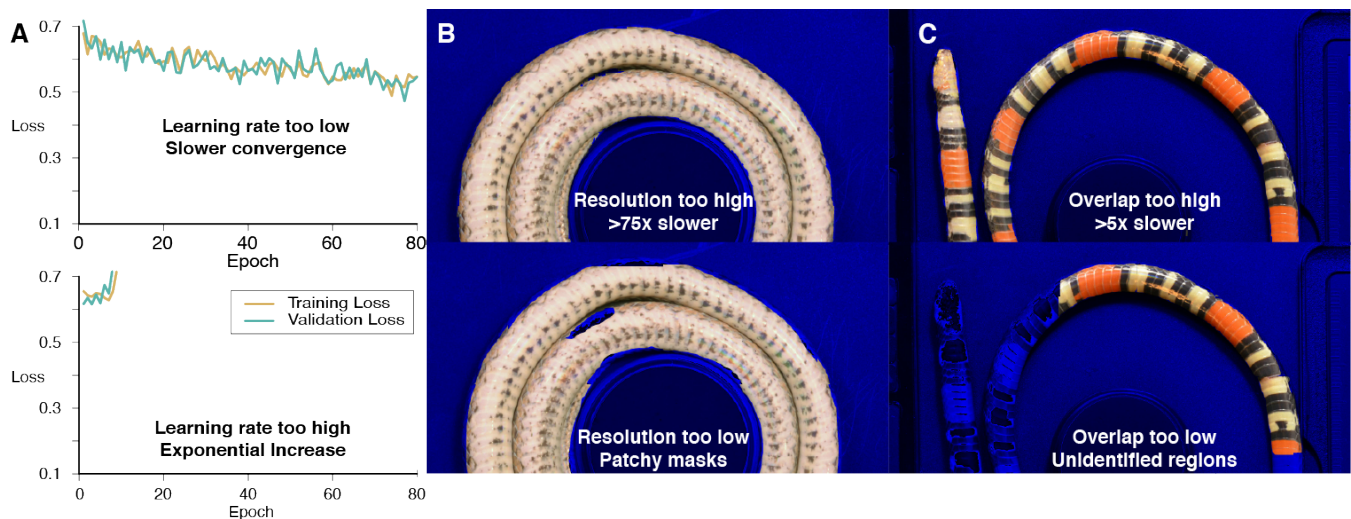

**FIGURE 4** Visual guide to troubleshooting the training process. Each column in this diagram represents the indicators for tuning a different parameter. Loss plots can be used to troubleshoot a) Learning rate. Mask quality can be used to troubleshoot b) Subdivision/Resolution, c) Overlap. The top row displays the output indicating that the parameter should be increased. The bottom row displays the output indicating that the parameter should be decreased. Note that the loss plots are exaggerated to show the most recognizable patterns and were not generated by training results.

## 144 4.3 | Post-Processing

145 Because the loss calculation does not penalize non-ROI pixels misidentified as ROI pixels, the resulting inferred masks will  
146 likely include pixels outside of the snake. To eliminate these outliers, our script uses the OpenCV function `findContours` to  
147 identify the largest contiguous unmasked area and eliminate unconnected areas. This is helpful if portions of the background are  
148 being recognized incorrectly as ROI. If the ROI is in more than one contiguous piece, this function can be changed to recognize  
149 two or more unmasked areas.



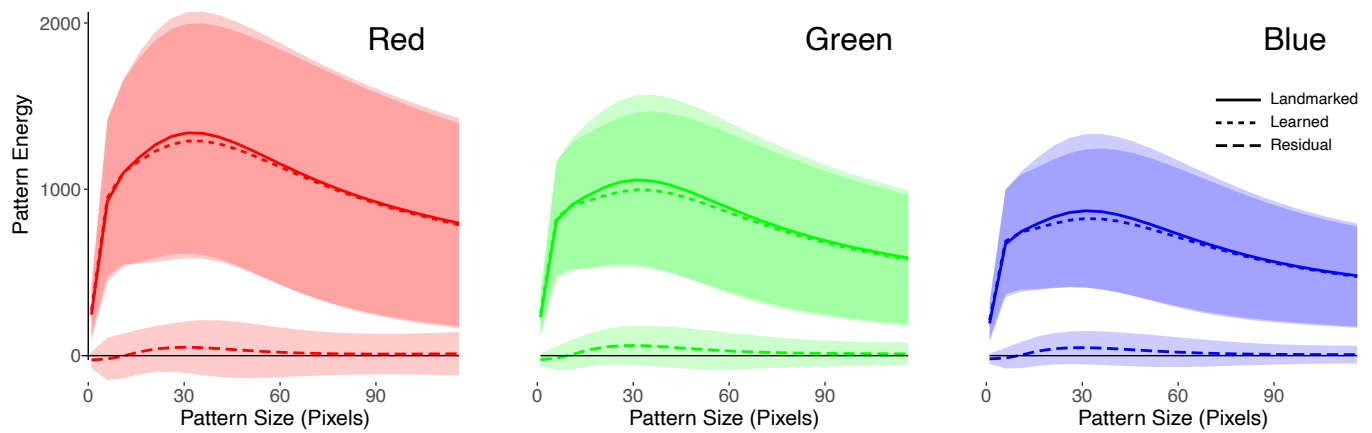

**FIGURE 5** The mean residual differences (dashed line) between the pattern energies computed using the hand-labeled (solid line) and the inferred (dotted line) masks for the each photograph in the training dataset. Differences are sorted by color channel: red, green, and blue. The clouds represent the standard deviation from the mean for each pattern size in the color channel.

## 5 | DOWNSTREAM ANALYSES AND COMPATIBILITIES

Here, we demonstrate the ease of incorporating our Batch-Mask approach into a Python workflow for processing large datasets by analyzing the color pattern energy of snakes in the dataset (Figure 2 C).

Prior to analysis, we identified the gray size standard in each photograph using the Circle Hough Transform algorithm (available from OpenCV (Bradski, 2000)). The gray standard and snake ROIs were combined and exported into a single JSON file.

### 5.1 | An automated workflow for color analysis

We incorporated the micaToolbox functions into the Batch-Mask workflow to combine color channels, scale the image by size, and create a single MSPEC file for pattern energy analysis of complexity in the snake ROI. To automate the process of generating MSPEC images, we modified the micaToolbox script to load the ROIs directly from the JSON file and batch-generate MSPEC files for multiple specimens at once.

To test whether the errors in machine-learned inference reduced the quality of color analyses, we compared hand-labeled masks to those produced by Batch-Mask for the photographs in the training set. Pattern energy as a function of pattern size for each color channel showed no significant differences between the hand-labeled and inferred datasets (paired t-tests, all  $p > 0.05$ , Figure 5 ). These results demonstrate that small pixel-wise differences between the hand-labeled and inferred datasets do not compromise the quality of downstream color analyses.

## 166 6 | GLOSSARY

- 167 ● **Mask R-CNN:** A Region-based Convolutional Neural Network that uses a mix of convolutional layers and fully connected  
168 layers to classify images.
- 169 ● **Mask:** Binary array with the same dimensions as the image, with 1 indicating snake pixels and 0 indicated non-snake  
170 pixels.
- 171 ● **Region of interest (ROI):** Parts of an image outlined by a polygon or designated by a binary array.
- 172 ● **Label:** Human-generated ROIs for both the training and validation sets.
- 173 ● **Landmarking:** Identifying the locations of comparable morphological features among distinct biological specimens.
- 174 ● **JSON:** JavaScript Object Notation formatted file comprising landmarking and image information.
- 175 ● **Weights:** Values applied and changed during training to fit the neural network to data. Pre-trained weights ( $W_{PT}$ ) were  
176 provided with the standard Mask R-CNN model trained on the COCO dataset. Fine-tuned weights ( $W_{FT}$ ) fit during training  
177 are utilized, but not changed, during inference.
- 178 ● **Training pool:** Set of labeled photographs from which sample tiles are extracted to generate the training set. There is no  
179 overlap between training and validation pools.
- 180 ● **Training set:** Set of tiles sampled from photographs in the training pool. There is no overlap between training and  
181 validation sets.
- 182 ● **Training step:** The neural network predicts the label for a tile from the training set, then updates the model weights if the  
183 model fails to match the true mask.
- 184 ● **Validation pool:** Set of labeled photographs from which sample tiles are extracted to generate the validation set. There is  
185 no overlap between training and validation pools.
- 186 ● **Validation set:** Set of labeled tiles used for the validation steps of the training process. There is no overlap between  
187 training and validation sets.
- 188 ● **Validation step:** The neural network predicts the label for an image from the validation set but does not change the model  
189 weights. Validation steps calculate loss values on a labeled dataset that is distinct from the training set. This allows us to  
190 detect overfitting to the training dataset.

- 191 • **Loss:** A measure of the accuracy of model predictions for each pixel. Loss is calculated by the number of pixels shared  
192 by the label and the mask divided by the number of pixels in the label only, as in (He et al., 2017).
- 193 • **Epoch:** The interval of time after a certain number of training and validation steps have been completed. Model weights  
194 are saved after each epoch. Changing the number of training and validation steps per epoch changes how frequently model  
195 accuracy is assessed.
- 196 • **Training Process:** Using several epochs of training and validation to fine-tune model weights.
- 197 • **Inference Process:** Using fine-tuned weights to generate masks for data outside of the training and validation sets. Note  
198 that weights are not updated during inference.

## 199 7 | ACKNOWLEDGEMENTS

200 We thank H. Crowell and J. Crowe-Riddell for helpful discussions, S. R. Manikandasriram and W. Weaver for comments on  
201 an early manuscript draft. This work was supported in part by a University of Michigan Undergraduate Research Opportunity  
202 Program and an MCubed grant to ARDR and TYM.

## 203 8 | AUTHORS' CONTRIBUTIONS

204 TYM and ARDR conceived the study; TR and TYM designed the methodology; TR, JDC, and TYM performed the analysis;  
205 JDC, TR, and TYM led manuscript writing. All authors contributed critically to the drafts and gave final approval for publication.

## 206 9 | DATA AVAILABILITY

207 The masks associated with the photographs in the dataset are posted on Deep Blue Data <https://doi.org/10.7302/3xwv-7n71>.  
208 Code is posted on <https://github.com/EMBiRLab/batch-mask>.

## 209 10 | BIBLIOGRAPHY

### 210 References

211 M. Abadi, A. Agarwal, P. Barham, et al. TensorFlow: Large-scale machine learning on heterogeneous systems. [https://www.  
212 tensorflow.org/](https://www.tensorflow.org/), 2015. Software available from tensorflow.org.

- 213 W. Abdulla. Mask R-CNN for object detection and instance segmentation on Keras and TensorFlow. [https://github.com/](https://github.com/matterport/Mask_RCNN)  
214 [matterport/Mask\\_RCNN](https://github.com/matterport/Mask_RCNN), 2017.
- 215 W. L. Allen, R. Baddeley, N. E. Scott-Samuel, and I. C. Cuthill. The evolution and function of pattern diversity in snakes.  
216 *Behavioral Ecology*, 24(5):1237–1250, 2013. URL <https://doi.org/10.1093/beheco/art058>.
- 217 G. Bradski. The OpenCV Library. *Dr. Dobb's Journal of Software Tools*, 2000. URL [https://www.drdoobs.com/open-source/](https://www.drdoobs.com/open-source/the-opencv-library/184404319)  
218 [the-opencv-library/184404319](https://www.drdoobs.com/open-source/the-opencv-library/184404319).
- 219 E. D. Brodie III. Differential avoidance of coral snake banded patterns by free-ranging avian predators in Costa Rica. *Evolution*,  
220 47(1):227–235, 1993. URL <https://doi.org/10.1111/j.1558-5646.1993.tb01212.x>.
- 221 C. C. Davis, J. Champ, D. S. Park, et al. A new method for counting reproductive structures in digitized herbarium specimens  
222 using Mask R-CNN. *Frontiers in Plant Science*, 11(1129), 2020. URL <https://doi.org/10.3389/fpls.2020.01129>.
- 223 E. M. Ditria, S. Lopez-Marcano, M. Sievers, et al. Automating the analysis of fish abundance using object detection: Optimizing  
224 animal ecology with deep learning. *Frontiers in Marine Science*, 7(429), 2020. URL [https://doi.org/10.3389/fmars.2020.](https://doi.org/10.3389/fmars.2020.00429)  
225 [00429](https://doi.org/10.3389/fmars.2020.00429).
- 226 A. Feldman, N. Sabath, R. A. Pyron, et al. Body sizes and diversification rates of lizards, snakes, amphisbaenians and the tuatara.  
227 *Global Ecology and Biogeography*, 25(2):187–197, 2015. URL <https://doi.org/10.1111/geb.12398>.
- 228 I. Guyon. A scaling law for the validation-set training-set size ratio. Technical report, AT&T Bell Laboratories, 1997.
- 229 K. He, G. Gkioxari, P. Dollár, and R. Girshick. Mask R-CNN. In *Proceedings of the IEEE International Conference on Computer*  
230 *Vision (ICCV)*, pages 2980–2988. 2017 IEEE International Conference on Computer Vision (ICCV), 2017. .
- 231 A. Kumar and S. D. Das. Bird species classification using transfer learning with multistage training. In C. Arora and K. Mitra, edi-  
232 tors, *Computer Vision Applications*, volume 1019, pages 28–38, Singapore, 2019. WCVA 2018. Communications in Computer  
233 and Information Science, Springer. URL [https://doi.org/10.1007/978-981-15-1387-9\\_3](https://doi.org/10.1007/978-981-15-1387-9_3).
- 234 Y. Li, F. X. Wu, and A. Ngom. A review on machine learning principles for multi-view biological data integration. *Briefings in*  
235 *Bioinformatics*, 19(2):325–340, 2018. URL <https://doi.org/10.1093/bib/bbw113>.
- 236 F. J. Rohlf. tpsDig. <http://life.bio.sunysb.edu/morph/index.html>.
- 237 J. Schindelin, I. Arganda-Carreras, E. Frise, et al. Fiji: An open-source platform for biological-image analysis. *Nature Methods*,  
238 9(7):676–682, 2012. URL <https://doi.org/10.1038/nmeth.2019>.



- 239 H. I. Suk. An Introduction to Neural Networks and Deep Learning. In *Deep Learning for Medical Image Analysis*, pages 3–24.  
240 Elsevier, jan 2017. URL <https://doi.org/10.1016/B978-0-12-810408-8.00002-X>.
- 241 J. Troscianko and M. Stevens. Image calibration and analysis toolbox - A free software suite for objectively measuring  
242 reflectance, colour and pattern. *Methods in Ecology and Evolution*, 6:1320–1331, 2015. URL [https://doi.org/10.1111/  
243 2041-210X.12439](https://doi.org/10.1111/2041-210X.12439).
- 244 University of Michigan Museum of Zoology, Division of Herpetology, A. R. Davis Rabosky, J. G. Larson, T. Y. Moore, and  
245 J. D. Curlis. Neotropical snake photographs. University of Michigan - Deep Blue Data Repository, 2021. URL [https:  
246 //doi.org/10.7302/qta3-xs67](https://doi.org/10.7302/qta3-xs67).
- 247 S. M. Van Belleghem, Riccardo Papa, H. Ortiz-Zuazaga, et al. Patternize: An R package for quantifying colour pattern variation.  
248 *Methods in Ecology and Evolution*, 9(2):390–398, 2018. URL <https://doi.org/10.1111/2041-210X.12853>.
